# Supplementary material
Source: PubMed Central journal article supplement (PMC3338873)
Supplement: NIHMS345065-supplement-1.pdf [file NIHMS345065-supplement-1.pdf]

Heparin-binding epidermal growth factor-like growth factor suppresses experimental liver fibrosis in mice

Guangcun Huang, Gail E. Besner and David R. Brigstock

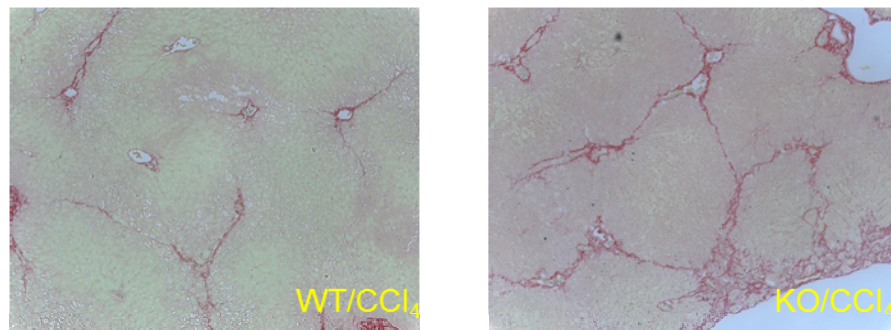

**Fig. S1. Sirius Red staining.** HB-EGF<sup>+/+</sup> (WT) or HB-EGF<sup>-/-</sup> (KO) mice received intra-peritoneal injection of 0.5  $\mu$ l CCl<sub>4</sub> in 29.5  $\mu$ l vegetable oil or 30  $\mu$ l vegetable oil alone three times per week for 5 weeks. Liver tissues were removed, fixed, and sections of 5  $\mu$ m were processed for Sirius Red staining.

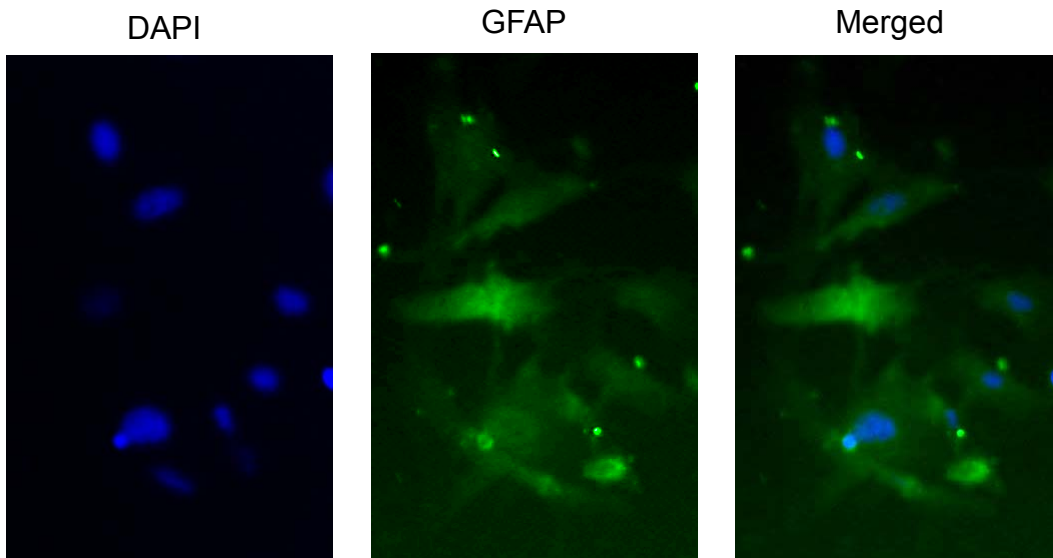

**Fig. S2. GFAP staining.** HSC isolated from untreated HB-EGF<sup>+/+</sup> (WT) mice were cultured for 3 days and then processed for DAPI nuclear staining and immunofluorescent staining for GFAP.

Table S1. Staining area (%) of Sirius Red or  $\alpha$ -SMA protein

| Animal   | Sirius Red | $\alpha$ -SMA |
|----------|------------|---------------|
| WT-1     | 2.6        | 0.4           |
|          | 3.4        | 0.8           |
|          | 5.0        | 2.4           |
| WT-2     | 1.3        | 2.8           |
|          | 3.5        | 2.7           |
|          | 2.0        | 1.8           |
| WT-3     | 3.1        | 0.9           |
|          | 3.2        | 1.5           |
|          | 2.0        | 3.0           |
| WT-4     | 1.2        | 3.9           |
|          | 1.3        | 2.9           |
|          | 4.1        | 2.7           |
| WT-5     | 2.0        | 3.5           |
|          | 1.4        | 2.0           |
|          | 4.5        | 2.2           |
| WT/TAA-1 | 1.8        | 8.2           |
|          | 3.2        | 8.9           |
|          | 4.0        | 9.9           |
| WT/TAA-2 | 1.8        | 3.9           |
|          | 2.4        | 6.7           |
|          | 3.0        | 9.3           |
| WT/TAA-3 | 6.5        | 8.6           |
|          | 4.9        | 7.4           |
|          | 5.0        | 6.7           |
| WT/TAA-4 | 5.8        | 3.0           |
|          | 8.1        | 7.3           |
|          | 10.3       | 11.5          |
| KO-1     | 1.1        | 1.4           |
|          | 1.9        | 1.7           |
|          | 0.8        | 2.0           |
| KO-2     | 1.2        | 1.4           |
|          | 0.9        | 2.5           |
|          | 0.6        | 2.9           |
| KO-3     | 2.1        | 1.6           |
|          | 3.3        | 2.3           |
|          | 4.2        | 4.8           |
| KO-4     | 2.1        | 2.4           |
|          | 2.3        | 4.3           |
|          | 7.2        | 6.5           |
| KO-5     | 3.1        | 2.3           |
|          | 2.9        | 2.5           |
|          | 1.0        | 2.7           |
| KO/TAA-1 | 12.2       | 12.6          |
|          | 8.3        | 16.3          |
|          | 6.9        | 19.6          |
| KO/TAA-2 | 7.5        | 21.6          |
|          | 6.0        | 16.2          |
|          | 9.3        | 13.8          |
| KO/TAA-3 | 6.4        | 7.8           |
|          | 8.9        | 13.4          |
|          | 8.7        | 10.5          |

Staining area (%) for Sirius Red or  $\alpha$ -SMA protein was analyzed with NIH image software ImageJ. Each value represents one determination.

Table S2.  $\alpha$ -SMA mRNA level in HSC on Day 3 or 5 of primary culture

|       | Experiment | WT     | KO     | <i>p</i> value |
|-------|------------|--------|--------|----------------|
| Day 3 | 1          | 154.8  | 185.1  | 0.027          |
|       | 2          | 124.7  | 175.8  |                |
|       | 3          | 52.6   | 107.7  |                |
| Day 5 | 1          | 2568.9 | 2633.6 | 0.013          |
|       | 2          | 2532.4 | 2578.5 |                |
|       | 3          | 2374.4 | 2443   |                |

Each value represents the mean of three real-time PCR determinations from three sets of independent experiments, with paired t-test analysis.
